# Supplementary material for: The associations between staffing hours and quality of care indicators in long-term care
Source: PubMed Central journal article supplement (PMC6171224; doi:10.1186/s12913-018-3552-5), 2018-10-03

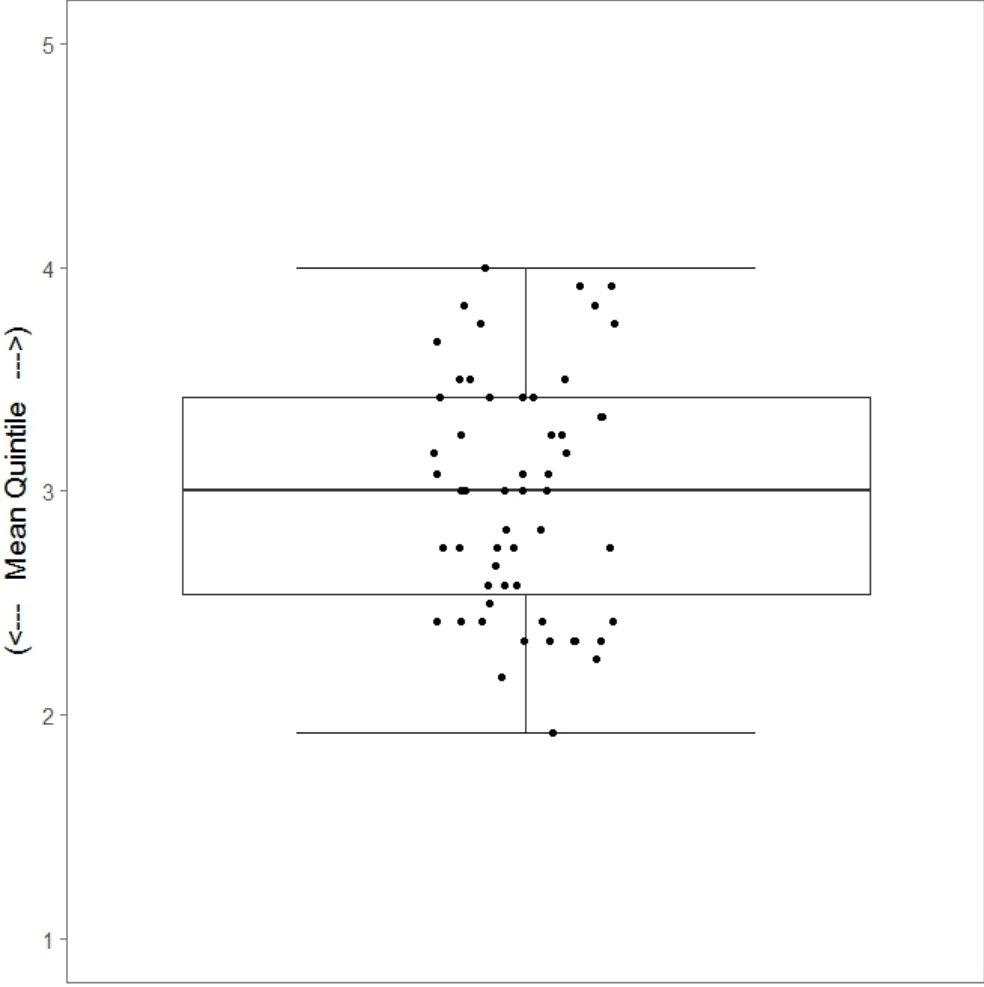

Supplement: 12913_2018_3552_MOESM1_ESM.pdf [file 12913_2018_3552_MOESM1_ESM.pdf]
