# Supplementary material for: The associations between staffing hours and quality of care indicators in long-term care
Source: PubMed Central journal article supplement (PMC6171224; doi:10.1186/s12913-018-3552-5), 2018-10-03
Supplement: 12913_2018_3552_MOESM2_ESM.pdf [file 12913_2018_3552_MOESM2_ESM.pdf]

| _NAME_                    | cmi    | RN hrs per pt day | RPN hrs per pt day | pca_hrs per pt day | ag_hrs_ptday | rn_late_10m plus_percent | rpn_late_10m plus_percent | pca_late_10m plus_percent | rn_stayed30m_percent | rpn_stayed30m_percent | pca_stayed30m_percent | pca_7 years plus_percent | fulltime_percent |
|---------------------------|--------|-------------------|--------------------|--------------------|--------------|--------------------------|---------------------------|---------------------------|----------------------|-----------------------|-----------------------|--------------------------|------------------|
| cmi                       |        | 0.076             | 0.363              | 0.402              | -0.286       | 0.003                    | -0.091                    | -0.262                    | 0.206                | -0.076                | 0.106                 | -0.154                   | -0.270           |
| RN_hrs_per_pt_day         | 0.076  |                   | -0.524             | 0.150              | -0.350       | -0.084                   | -0.507                    | -0.466                    | -0.618               | -0.522                | -0.184                | 0.386                    | 0.331            |
| RPN_hrs_per_pt_day        | 0.363  | -0.524            |                    | 0.103              | -0.038       | -0.128                   | 0.295                     | 0.162                     | 0.433                | 0.439                 | 0.046                 | -0.157                   | -0.380           |
| pca_hrs_per_pt_day        | 0.402  | 0.150             | 0.103              |                    | -0.196       | -0.238                   | 0.120                     | -0.003                    | 0.060                | -0.219                | 0.004                 | -0.011                   | -0.140           |
| ag_hrs_ptday              | -0.286 | -0.350            | -0.038             | -0.196             |              | -0.211                   | 0.062                     | 0.416                     | 0.196                | 0.324                 | 0.241                 | -0.449                   | -0.202           |
| rn_late_10m plus_percent  | 0.003  | -0.084            | -0.128             | -0.238             | -0.211       |                          | 0.029                     | 0.023                     | -0.080               | -0.131                | -0.088                | -0.077                   | 0.103            |
| rpn_late_10m plus_percent | -0.091 | -0.507            | 0.295              | 0.120              | 0.062        | 0.029                    |                           | 0.545                     | 0.075                | 0.215                 | -0.028                | 0.211                    | -0.190           |
| pca_late_10m plus_percent | -0.262 | -0.466            | 0.162              | -0.003             | 0.416        | 0.023                    | 0.545                     |                           | 0.128                | 0.370                 | 0.177                 | -0.050                   | -0.183           |
| rn_stayed30m_p            | 0.206  | -0.618            | 0.433              | 0.060              | 0.196        | -0.080                   | 0.075                     | 0.128                     |                      | -0.012                | 0.011                 | -0.539                   | -0.246           |

|                         |        |        |        |        |        |        |        |        |        |        |        |       |        |
|-------------------------|--------|--------|--------|--------|--------|--------|--------|--------|--------|--------|--------|-------|--------|
| ercent                  |        |        |        |        |        |        |        |        |        |        |        |       |        |
| rpn_stayed30m_percent   | -0.076 | -0.522 | 0.439  | -0.219 | 0.324  | -0.131 | 0.215  | 0.370  | -0.012 |        | 0.349  | 0.007 | -0.428 |
| pca_stayed30m_percent   | 0.106  | -0.184 | 0.046  | 0.004  | 0.241  | -0.088 | -0.028 | 0.177  | 0.011  | 0.349  |        | 0.067 | -0.228 |
| pca_7years_plus_percent | -0.154 | 0.386  | -0.157 | -0.011 | -0.449 | -0.077 | 0.211  | -0.050 | -0.539 | 0.007  | 0.067  |       | 0.181  |
| fulltime_percent        | -0.270 | 0.331  | -0.380 | -0.140 | -0.202 | 0.103  | -0.190 | -0.183 | -0.246 | -0.428 | -0.228 | 0.181 |        |
